# Supplementary material for: Up to 5-year retention of abatacept in Belgian patients with moderate-to-severe rheumatoid arthritis: a sub-analysis of the international, observational ACTION study
Source: Springer Nature journal article supplement (doi:10.1007/s00296-020-04619-z), 2020-06-17
Supplement: MOESM1 [file 18092306]

**Up to 5-year retention of abatacept in Belgian patients with moderate-to-severe rheumatoid arthritis: prospective data from a real-world study**

***Supplementary material***

*Rheumatology International*

R Westhovens<sup>a</sup>, SE Connolly<sup>b</sup>, J Margaux<sup>c</sup>, M Vanden Berghe<sup>d</sup>, M Maertens<sup>e</sup>, M Van den Berghe<sup>f</sup>, Y Elbez<sup>g</sup>, M Chartier<sup>h</sup>, F Baeke<sup>h</sup>, S Robert<sup>h</sup>, M Malaise<sup>i</sup>

<sup>a</sup>University Hospitals Leuven, Department of Development and Regeneration, Skeletal Biology and Engineering Research Center Leuven, Belgium

<sup>b</sup>Bristol-Myers Squibb, Princeton, New Jersey, United States

<sup>c</sup>Rheumatology and Physical Medicine Department, Erasme Hospital, Brussels, Belgium.

<sup>d</sup>Grand Hôpital de Charleroi, Charleroi, Belgium

<sup>e</sup>AZ Damiaan, Oostende, Belgium

<sup>f</sup>ASZ Aalst, Wetteren, Belgium

<sup>g</sup>Excelya, Boulogne-Billancourt, France

<sup>h</sup>Bristol-Myers Squibb, Braine-l'Alleud, Belgium

<sup>i</sup>CHU Sart Tilman, Liège, Belgium

**Corresponding author**

R Westhovens, University Hospitals, Herestraat 49, 3000 Leuven, Belgium. E-mail: [rene.westhovens@uzleuven.be](mailto:rene.westhovens@uzleuven.be) (ORCID: <https://orcid.org/0000-0002-3432-3073>)

**Supplementary Table S1: Subgroup analysis-comparison of baseline characteristics of subgroup of patients discontinuing due to lack of efficacy versus the rest of the study population**

| Characteristics                            | Subgroup                                       |                                     | p-value |
|--------------------------------------------|------------------------------------------------|-------------------------------------|---------|
|                                            | discontinuation due to lack of efficacy (N=37) | Rest of the study population (N=98) |         |
| ESR (mL), mean*                            | 32.54                                          | 22.27                               | 0.047   |
| CRP (mg/L), mean**                         | 17.2                                           | 8.78                                | 0.0472  |
| <b>Duration RA, n (%)</b>                  |                                                |                                     |         |
| ≤2 years                                   | 11 (29.3)                                      | 9 (9.8)                             | 0.0339  |
| 2–5 years                                  | 9 (24.3)                                       | 20 (21.7)                           |         |
| 5–10 years                                 | 8 (21.6)                                       | 26 (28.3)                           |         |
| >10 years                                  | 9 (24.3)                                       | 37 (40.2)                           |         |
| <b>Number of prior csDMARDs, mean (SD)</b> | 2.49 (0.99)                                    | 2.02 (1.05)                         | 0.02    |
| <b>Number of prior anti-TNFs, n (%)</b>    |                                                |                                     |         |
| <2                                         | 28 (75.68)                                     | 55 (56.12)                          | 0.0474  |
| ≥2                                         | 9 (24.32)                                      | 43 (43.88)                          |         |

CRP, C-reactive protein; csDMARD, conventional synthetic disease-modifying anti-rheumatic drug; ESR, erythrocyte sedimentation rate; N, number of patients for which the results are known by the physician; n (%), number (percentage) of patients in each category; RA, rheumatoid arthritis; SD, standard deviation; TNF, tumor necrosis factor.

\* Number of patients with evaluable data: N=26 for subgroup discontinuing and N=74 for rest of the population.

\*\* Number of patients with evaluable data: N=25 for subgroup discontinuing and N=86 for rest of the population.
